# Supplementary material for: Diagnosis of Obstructive Sleep Apnea in Parkinson’s Disease Patients: Is Unattended Portable Monitoring a Suitable Tool?
Source: Hindawi journal article supplement (doi:10.1155/2015/258418), 2015-01-01
Supplement: f1 [file 258418.f1.pdf]

## Supplementary materials

**Table 7.** Correlation of signals quality with PD variables

|                                  | H&Y score |          | PD duration |          | UPDRS motor |          | MoCA score |          | Dysautonomia |          |
|----------------------------------|-----------|----------|-------------|----------|-------------|----------|------------|----------|--------------|----------|
|                                  | r.        | P-values | r.          | P-values | r           | P-values | r          | P-values | r            | P-values |
| Airflow signal quality           | -0.10     | 0.62     | -0.16       | 0.41     | -0.11       | 0.58     | 0.17       | 0.40     | 0.12         | 0.54     |
| Oxygen saturation signal quality | -0.24     | 0.24     | 0.13        | 0.52     | -0.19       | 0.37     | 0.12       | 0.55     | 0.14         | 0.48     |
| Pulse signal quality             | -0.22     | 0.28     | 0.16        | 0.44     | -0.16       | 0.44     | 0.13       | 0.54     | 0.19         | 0.36     |

PD: Parkinson's Disease

r. : Correlation coefficient

H&Y: Hoehn and Yahr score for PD staging

PD duration: number of years since PD diagnosis

UPDRS motor: motor part of the Unified Parkinson's Disease Rating Scale

MoCA: Montreal Cognitive Assessment
